# Supplementary material for: Developing an Instrument to Assess Children's Capacity for Assent in Research Settings: Considering the Capacity of Five-year-olds in Japan
Source: Research Square preprint supplement (doi:10.21203/rs.3.rs-506179/v1), 2021-05-10
Supplement: Supplementary file 3 [file 981b1581be0e3a4af9b4e90f.xlsx]

## Sheet: Sheet1
Table 2. Factor analysis result of 10 items with Promax rotation (n=68)
Questions	f1	f2	f3
What are you going to do in the next room?	0.861	-0.134	0.091
So, how would you answer the questions?	0.854	-0.072	-0.077
What are you going to do to help us?	0.767	0.053	0.053
How would it be useful if you answer the questions?	0.562	0.189	0.009
Is this a test?	0.379	0.314	-0.039
Must you take part?	-0.06	0.919	-0.008
Is it okay to stop participating at any time?	-0.07	0.641	0.091
Do you think the questions will be fun?	0.289	0.428	-0.053
Questions of reasoning depending on the choice	-0.016	-0.036	1.016
Do you think you are more likely to take part?	0.043	0.099	0.67
Interfactor correlation	f1	f2	f3
f1	−	0.508	0.469
f2		−	0.281
f3			−
