# Supplementary material for: Developing an Instrument to Assess Children's Capacity for Assent in Research Settings: Considering the Capacity of Five-year-olds in Japan
Source: Research Square preprint supplement (doi:10.21203/rs.3.rs-506179/v1), 2021-05-10
Supplement: Supplementary file 4 [file a623da58e137ddd09f69587d.xlsx]

## Sheet: Table2 Characteristics
Table 3. Characteristics of participants and responses to the scale
					§ n (%)
		Total	4 year group	5 year group	6 year group
Number of participants §		68 (100.0)	24 (35.3)	25 (36.8)	19 (27.9)
Average age		5.4 years old	4.5 years old	5.5 years old	6.3 years old
Gender§
	Female	37 (54.4)	14 (58.3)	13 (52.0)	10 (52.6)
	Male	31 (45.6)	10 (41.7)	12 (48.0)	9 (47.4)
Interview participation style§
	Child only	65 (95.6)	21 (87.5)	25 (100.0)	19 (100.0)
	With a guardian	3 (4.4)	3 (12.5)	0 (0.0)	0 (0.0)
Expressed choice§
	Assent	64 (94.1)	22 (91.7)	24 (96.0)	18 (94.7)
	Dissent	2 (2.9)	1 (4.2)	1 (4.0)	0 (0.0)
	Neither	2 (2.9)	1 (4.2)	0 (0.0)	1 (5.3)
Writing style on assent form§ (Based on χ2 test; p <0.05 )
	Signed full name	18 (28.1)	1 (4.5)	10 (41.7)	7 (38.9)
	Signed first name	27 (42.2)	9 (40.9)	9 (37.5)	9 (50.0)
	Drew a mark	19 (29.7)	12 (54.5)	5 (20.8)	2 (11.1)
Average interview time		9.6min	10.3min	9.6min	8.8min
Average of scale score		14.4±3.8	11.9±4.1	15.6±2.9	15.8±2.9
