# Supplementary material for: Developing an Instrument to Assess Children's Capacity for Assent in Research Settings: Considering the Capacity of Five-year-olds in Japan
Source: Research Square preprint supplement (doi:10.21203/rs.3.rs-506179/v1), 2021-05-10
Supplement: Supplementary file 6 [file 67813ebb18ba8aff1234daa0.xlsx]

## Sheet: Table1 Instrument
Table 1. Instrument to Assess Children’s Capacity for Assent: Semi Structured Interview Guide and Record Form
Capacity in 3 sections		Scenarios and Questions									Scores
Understanding & Appreciation (range 0-16)		Do you have any questions about what I just said?
		Can you tell me your understanding of what I just said?
											Participant answered in own words		Nodded clearly to additional explanations		Participant did not respond clearly
		If the participant fails to answer spontaneously, ask
		1. Research plan			What are you going to do in the next room?						2		1		0
					What are you going to do to help us?						2		1		0
					Is this a test?						2		1		0
					So, how would you answer the questions?						2		1		0
		2. Aim, Risk and benefit			Do you think the questions will be fun?						2		1		0
					How would it be useful if you answer the questions?						2		1		0
		3. Possible withdrawal			Must you take part?						2		1		0
					Is it okay to stop participating at any time?						2		1		0
Expressing a Choice (range 0-2)		Do you think you are more likely to take part?									Participant answered in own words		Participant nodded or shaked head clearly		Participant did not respond clearly
											2		1		0
Reasoning & Consistency (range 0-2)		If the participant says 'Yes' or nods clearly.									Signs or draws a mark on assent form		Signs or draws a mark showing hesitation		Does not sign or draw a mark
			If you agree to answer the questions, please sign or draw a mark on this form.
											2		1		0
		If the participant says 'No'.									Gives a rational reason		Gives an irrational reason		Does not give a reason
			If you refuse to answer the questions, please tell me why.
											2		1		0
		If the participant does not respond clearly.									Gives a rational or valid reason for their decision		Signs or draws a mark /Gives an irrational reason		Does nothing
			If you agree to answer the questions, please sign or draw a mark on this form.
			If you refuse to answer the questions, please tell me why.
			If you can't decide either, please tell me why.								2		1		0
