# Supplementary material for: Developing an Instrument to Assess Children's Capacity for Assent in Research Settings: Considering the Capacity of Five-year-olds in Japan
Source: Research Square preprint supplement (doi:10.21203/rs.3.rs-506179/v1), 2021-05-10
Supplement: Supplementary file 7 [file 85fbbbffce279ad75401ee73.xlsx]

## Sheet: Table4 UnderstandingScore
Table 5. Detailed score of Understanding & Appreciation analysed by age group
		4 year group	5 year group	6 year group
		Mean±SD	Mean±SD	Mean±SD
1. Research plan	What are you going to do in the next room?	1.0±0.6	1.4±0.6	1.6±0.5
	What are you going to do to help us?	0.8±0.7	1.4±0.6	1.5±0.6
	Is this a test?	1.5±0.7	1.9±0.2	1.9±0.3
	So, how would you answer the questions?	0.8±0.6	1.2±0.5	1.3±0.5
2. Aim, risk and benefit	Do you think the questions would be fun?	1.0±0.6	1.4±0.5	1.2±0.4
	How would it be useful if you answered the questions?	0.8±0.7	1.3±0.7	1.3±0.7
3. Possible withdrawal	Must you take part?	1.2±0.7	1.5±0.6	1.7±0.5
	Is it OK to stop taking part on the way?	1.5±0.8	1.7±0.6	1.7±0.5
		Based on t-tset; ✸✸p<0.01 ✸p<0.05
