# Supplementary material for: Developing an Instrument to Assess Children's Capacity for Assent in Research Settings: Considering the Capacity of Five-year-olds in Japan
Source: Research Square preprint supplement (doi:10.21203/rs.3.rs-506179/v1), 2021-05-10
Supplement: Supplementary file 8 [file f93be8f8609bf8919f1edded.xlsx]

## Sheet: Table3 CapacityScore
Table 4. Scale score in three capacity sections analysed by age group
		4 year group	5 year group	6 year group
		Mean±SD	Mean±SD	Mean±SD
Total scale score		11.9±4.1	15.6±2.9	15.8±2.9
(range 0-20)
Understanding & Appreciation score		8.6±3.7	11.8±2.6	12.2±2.3
(range 0-16)
Expressing a Choice score		1.7±0.6	1.9±0.3	1.8±0.5
(range 0-2)
Reasoning & Consistency score		1.6±0.6	1.9±0.3	1.8±0.5
(range 0-2)
			Based on t-tset; ✸✸p<0.01
